# Supplementary material for: Mn(ii) acetate: an efficient and versatile oxidation catalyst for alcohols
Source: Royal Society of Chemistry journal article supplement (doi:10.1039/c4cy00255e), 2014-01-01
Supplement: c4cy00255e1.pdf [file c4cy00255e1.pdf]

## Mn(II) acetate: An efficient and versatile oxidation catalyst for alcohols

Minna T. Räisänen,\* Afnan Al-Hunaiti, Elisa Atosuo, Marianna Kemell, Markku Leskelä and Timo Repo

*Laboratory of Inorganic Chemistry, Department of Chemistry, University of Helsinki, P.O. Box 55, FI-00014 Helsinki, Finland. Phone: + 358-9191 50203; fax: + 358-9191 50198; email: minna.t.raisanen@helsinki.fi*

### Electronic supplementary information (ESI)

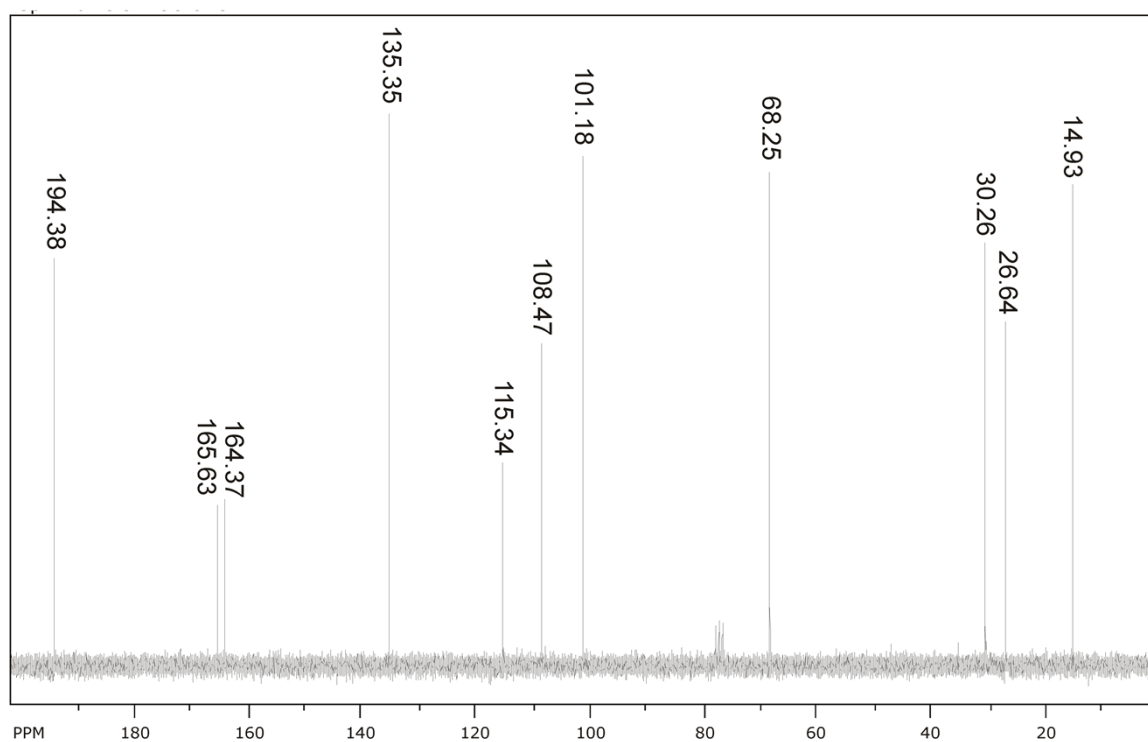

**Fig. S1** <sup>13</sup>C NMR spectrum of 2-hydroxy-4-[2-(ethylthio)ethoxy]benzaldehyde measured in CDCl<sub>3</sub>.

**Table S1**

Effect of TFA amount on the oxidation of 1-octanol and 2-octanol by a system based on Mn(OAc)<sub>2</sub>/tBuOOH.<sup>a</sup>

| Entry | Substrate | Main product    | TFA amount (μL) | Alcohol conversion (%) | Selectivity (%) |
|-------|-----------|-----------------|-----------------|------------------------|-----------------|
| 1     | 2-octanol | 2-octanone      | 0               | 46                     | >99.9           |
| 2     |           |                 | 7               | 87                     | >99.9           |
| 3     |           |                 | 25              | 67 <sup>b</sup>        | 78              |
| 4     |           |                 | 50              | 59 <sup>c</sup>        | 74              |
| 5     | 1-octanol | 1-octanoic acid | 0               | 25                     | 92              |
| 6     |           |                 | 7               | 60                     | >99.9           |
| 7     |           |                 | 25              | 42 <sup>d</sup>        | 67              |
| 8     |           |                 | 50              | 34 <sup>e</sup>        | 50              |

<sup>a</sup> Reaction conditions: 1 mmol substrate, 1.8 mol% Mn(OAc)<sub>2</sub>, 313 μL tBuOOH (2.5 equiv.), 7 μL TFA, 1.5 mL CH<sub>3</sub>CN, 80 °C, 21 h. <sup>b</sup> 19% of side products (hexanoic acid, heptanoic acid, 2,5-hexanedione, octan-2-yl 2,2,2-trifluoroacetate). <sup>c</sup> 21% of side products (hexanoic acid, heptanoic acid, octan-2-yl 2,2,2-trifluoroacetate). <sup>d</sup> 21% of octyl 2,2,2-trifluoroacetate and 5% of octyl acetate formed. <sup>e</sup> 34% of octyl 2,2,2-trifluoroacetate and 8% of octyl acetate formed.

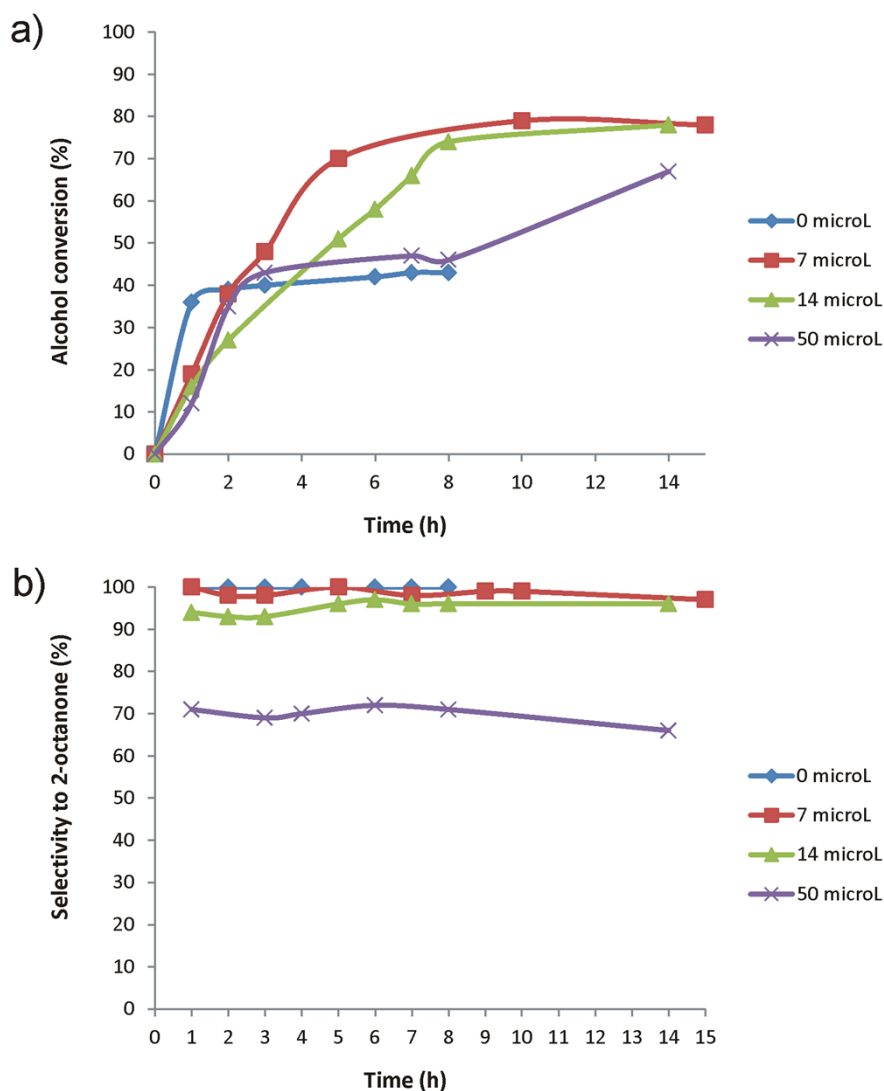

**Fig. S2** a) Conversion and b) selectivity of the oxidation reaction of 2-octanol with different TFA amounts (from 0 to 50  $\mu\text{L}$ ). Reaction conditions: 1 mmol of 2-octanol, 1.8 mol% of  $\text{Mn}(\text{OAc})_2$ , 1.5 mL of  $\text{CH}_3\text{CN}$ , 313  $\mu\text{L}$  of *t*BuOOH, 80  $^\circ\text{C}$ .

**Table S2**

Effect of carboxylic acid additive on the oxidation of 2-octanol by a system based on  $\text{Mn}(\text{OAc})_2/t\text{BuOOH}$ .<sup>a</sup>

| Entry | Acid additive                  | Alcohol conversion (%) | Selectivity to 2-octanone |
|-------|--------------------------------|------------------------|---------------------------|
| 1     | TFA, 7 $\mu\text{L}$           | 87                     | >99.9                     |
| 2     | acetic acid, 400 $\mu\text{L}$ | 66 <sup>b</sup>        | 87                        |

<sup>a</sup> Reaction conditions: 1 mmol 2-octanol, 1.8 mol%  $\text{Mn}(\text{OAc})_2$ , 313  $\mu\text{L}$  *t*BuOOH (2.5 equiv.), 1.5 mL  $\text{CH}_3\text{CN}$ , 80  $^\circ\text{C}$ , 21 h. <sup>b</sup> Side products: 7% hexanoic acid, 3% octan-2-yl acetate.

**Table S3**

Effect of solvent on the oxidation of 2-octanol by a system based on Mn(OAc)<sub>2</sub>/tBuOOH.<sup>a</sup>

| Entry | Solvent            | Alcohol conversion (%) | Selectivity to 2-octanone |
|-------|--------------------|------------------------|---------------------------|
| 1     | CH <sub>3</sub> CN | 87                     | >99.9                     |
| 2     | EtOAc              | 38 <sup>b</sup>        | 43                        |
| 3     | toluene            | 38 <sup>c</sup>        | 70                        |

<sup>a</sup> Reaction conditions: 1 mmol substrate, 1.8 mol% Mn(OAc)<sub>2</sub>, 313 μL tBuOOH (2.5 equiv.), 7 μL TFA, 1.5 mL solvent, 80 °C, 21 h. <sup>b</sup> Side products: 23% octan-2-yl 2,2,2-trifluoroacetate, 13% hexanoic acid, 5% heptanoic acid, 10% octanediones. <sup>c</sup> Side products: 8% heptanoic acid, 8% octan-2-yl 2,2,2-trifluoroacetate. Also formed large amounts of benzaldehyde and benzoic acid as well as traces of benzyl alcohol from the oxidation of toluene (2-octanone/benzaldehyde/benzoic acid/benzyl alcohol ratio 1:1.7:2.4:0.4).

**Table S4**

Reaction rate constants (*k*) obtained with different concentrations of 2-octanol. See Fig. 3 for the experimental conditions.

| 2-octanol (mmol) | [2-octanol] (M) | <i>k</i> (M/min) | R <sup>2</sup> |
|------------------|-----------------|------------------|----------------|
| 0.5              | 0.263158        | 0.0006           | 0.97           |
| 1.5              | 0.728509        | 0.0012           | 0.99           |
| 2.0              | 0.935454        | 0.0014           | 0.99           |

**Table S5**

Reaction rate constants (*k*) obtained with different concentrations of Mn(OAc)<sub>2</sub>. See Fig. 3 for the experimental conditions.

| Mn(OAc) <sub>2</sub> (mol%) | [Mn(OAc) <sub>2</sub> ] (M) | <i>k</i> (M/min) | R <sup>2</sup> |
|-----------------------------|-----------------------------|------------------|----------------|
| 0.45                        | 0.002276                    | 0.0006           | 0.99           |
| 0.90                        | 0.004552                    | 0.0007           | 0.98           |
| 3.60                        | 0.018207                    | 0.0012           | 0.99           |

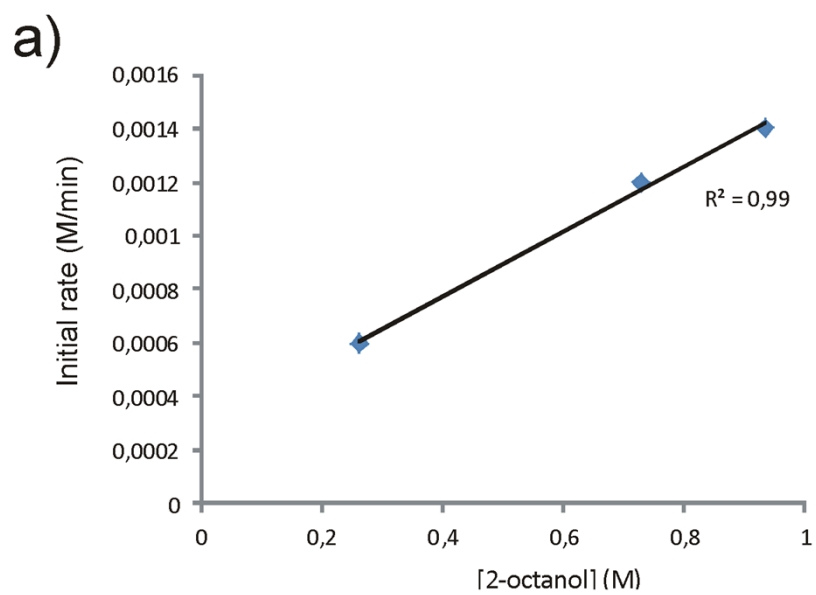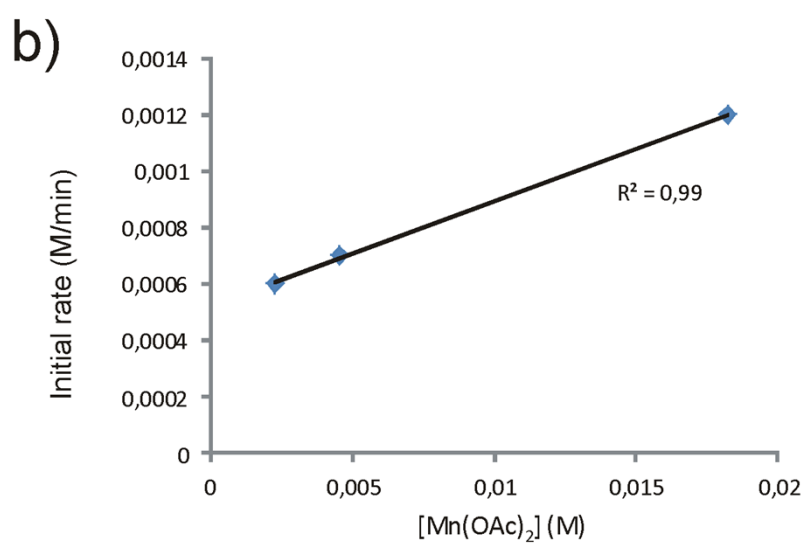

**Fig. S3** The initial oxidation rate depends linearly on the concentration of (a) 2-octanol and (b) Mn(OAc)<sub>2</sub>.

**Table S6**Oxidation of various alcohols with a Mn(OAc)<sub>2</sub>/tBuOOH system under argon.<sup>a</sup>

| Entry | Substrate              | Main product <sup>b</sup>                                               | Time (h) | Alcohol conv. (%)<br>[in air] | Select. (%)<br>[in air] |
|-------|------------------------|-------------------------------------------------------------------------|----------|-------------------------------|-------------------------|
| 1     | 2-octanol              | 2-octanone                                                              | 1.5      | 12 [25]                       | >99.9 [>99.9]           |
| 2     | 1-phenyl-1-propanol    | 1-phenyl-1-propanone                                                    | 2        | 39 [40]                       | >99.9 [>99.9]           |
| 3     | benzyl alcohol         | benzaldehyde                                                            | 8        | 40 [67]                       | 83 [52]                 |
| 4     | 4-nitrobenzyl alcohol  | 4-nitrobenzaldehyde                                                     | 4        | 29 [42]                       | >99.9 [>99.9]           |
| 5     | 1-naphthalenemethanol  | 1-naphthaldehyde<br><br>(1-naphthoic acid for the reaction done in air) | 8        | 35 [68]                       | 80 [74]                 |
| 6     | 4-chlorobenzyl alcohol | 4-chlorobenzaldehyde                                                    | 4        | 59 [62]                       | 73 [74]                 |
| 7     | 2-thiophenemethanol    | 2-thiophenecarboxaldehyde                                               | 15       | 93 [93]                       | 70 [67]                 |

<sup>a</sup> Reaction conditions: 1 mmol alcohol substrate, 18 μmol Mn(OAc)<sub>2</sub>, 313 μL tBuOOH (2.5 equiv.), 7 μL TFA, 1.5 mL CH<sub>3</sub>CN, 80 °C, Ar atmosphere. <sup>b</sup> Side products formed under Ar. Entry 3: 7% benzoic acid. Entry 5: 7% 1-naphthoic acid. Entry 6: 16% 4-chlorobenzoic acid. Entry 7: 13% 2-thiophenecarboxylic acid, 15% 2-methylthiophene.

**Table S7**Oxidation of hydrocarbons with the Mn(OAc)<sub>2</sub>/tBuOOH system under argon.<sup>a</sup>

| Entry | Substrate    | Main product <sup>b</sup> | Substrate conversion (%) | Selectivity (%) |
|-------|--------------|---------------------------|--------------------------|-----------------|
| 1     | cyclooctane  | cyclooctanone             | 32                       | 44              |
| 2     | isochroman   | isochroman-1-one          | 47                       | >99.9           |
| 3     | ethylbenzene | acetophenone              | 43                       | 42              |

<sup>a</sup> Reaction conditions: 1 mmol hydrocarbon substrate, 18 μmol Mn(OAc)<sub>2</sub>, 313 μL tBuOOH (2.5 equiv.), 7 μL TFA, 1.5 mL CH<sub>3</sub>CN, 70 °C, 16 h, Ar atmosphere. <sup>b</sup> Side products formed. Entry 1: 7% cyclooctene, 2% cyclooctanol, 9% unidentified compound. Entry 3: 10% benzaldehyde, 15% 1,1'-(oxydiethylidene)bisbenzene.

**Table S8**Oxidation of *N,N*-dimethylaniline (DMA) and *N,N*-dimethylaminopyridine (DMAP) in CH<sub>3</sub>CN with the Mn(OAc)<sub>2</sub>/tBuOOH system.<sup>a</sup>

| Entry | Substrate | Main product <sup>b</sup>                           | Substrate conversion (%) | Selectivity (%) |
|-------|-----------|-----------------------------------------------------|--------------------------|-----------------|
| 1     | DMA       | 4-(methylamino)benzaldehyde                         | 100                      | 42              |
| 2     | DMAP      | <i>N</i> -methyl- <i>N</i> -(pyridin-4-yl)formamide | 92                       | 49              |

<sup>a</sup> Reaction conditions: 1 mmol amine, 18 μmol Mn(OAc)<sub>2</sub>, 313 μL tBuOOH (2.5 equiv.), 7 μL TFA, 1.5 mL CH<sub>3</sub>CN, 70 °C, 16 h. <sup>b</sup> Side products. Entry 1: 40% 4-(dimethylamino)benzaldehyde, 4% *N*-(4-formylphenyl)-*N*-methylformamide, 7% *N*-methyl-*N*-phenylformamide, 7% *N*-methylaniline. Entry 2: 37% *N*-methylpyridin-4-amine, 5% 4-aminopyridine, 5% *N*-(pyridin-4-yl)formamide.

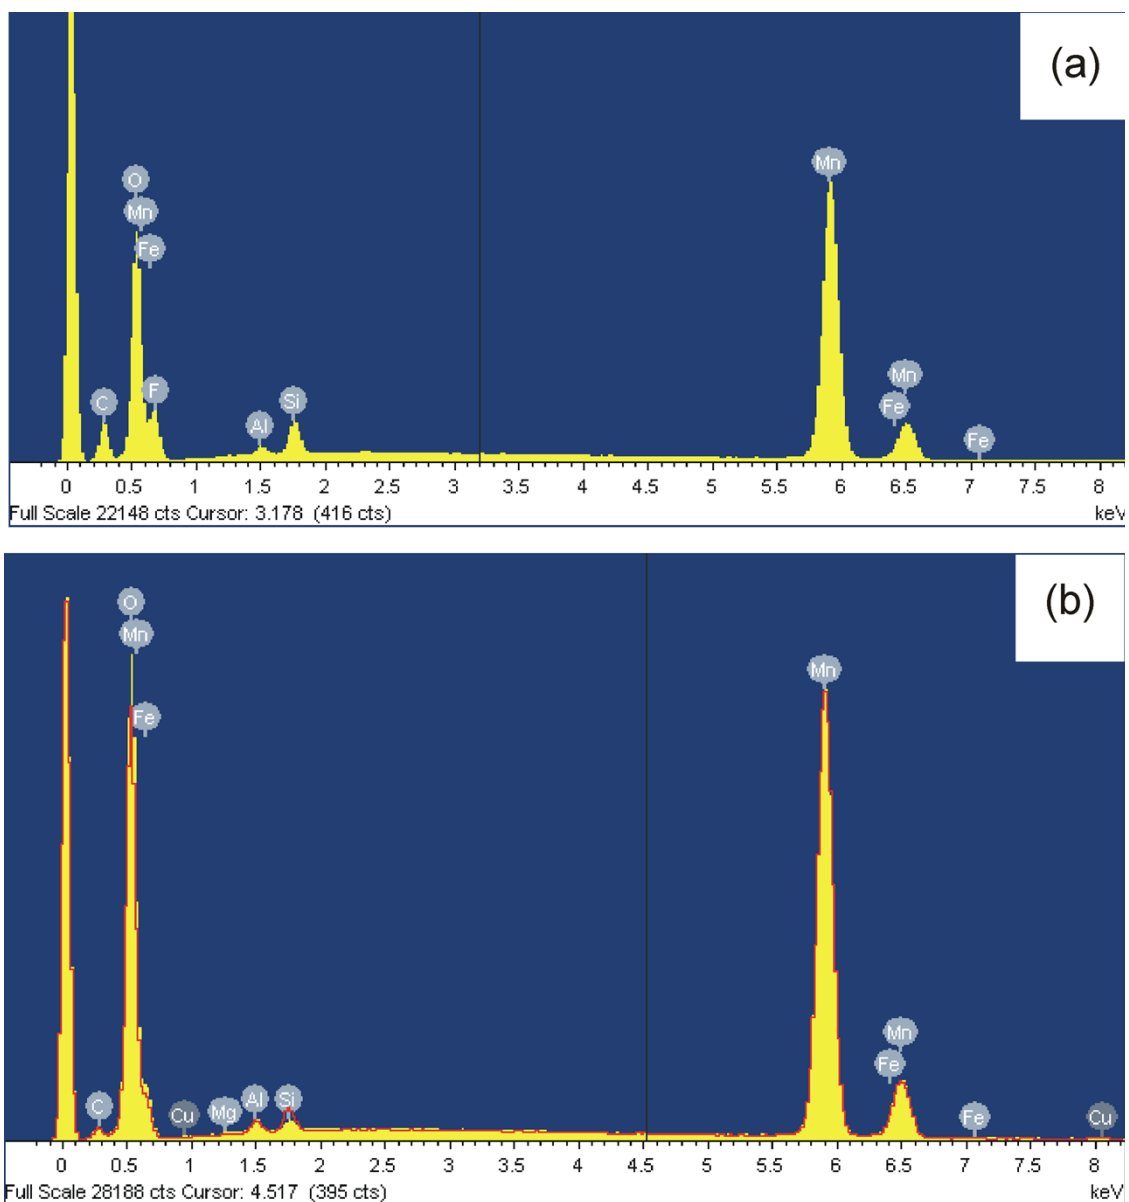

**Fig. S4** EDS spectra of (a) the black precipitate formed during the alcohol oxidation reaction in the absence of TFA and of (b) commercial  $\text{MnO}_2$  powder (Merck, 85-90%). The Mn/O  $K\alpha$  ratio for the powder isolated from the reaction mixture is 2.8. The theoretical Mn/O  $K\alpha$  ratio is 2.4 for  $\text{MnO}_2$  and 3.3 for  $\text{Mn}_2\text{O}_3$ .



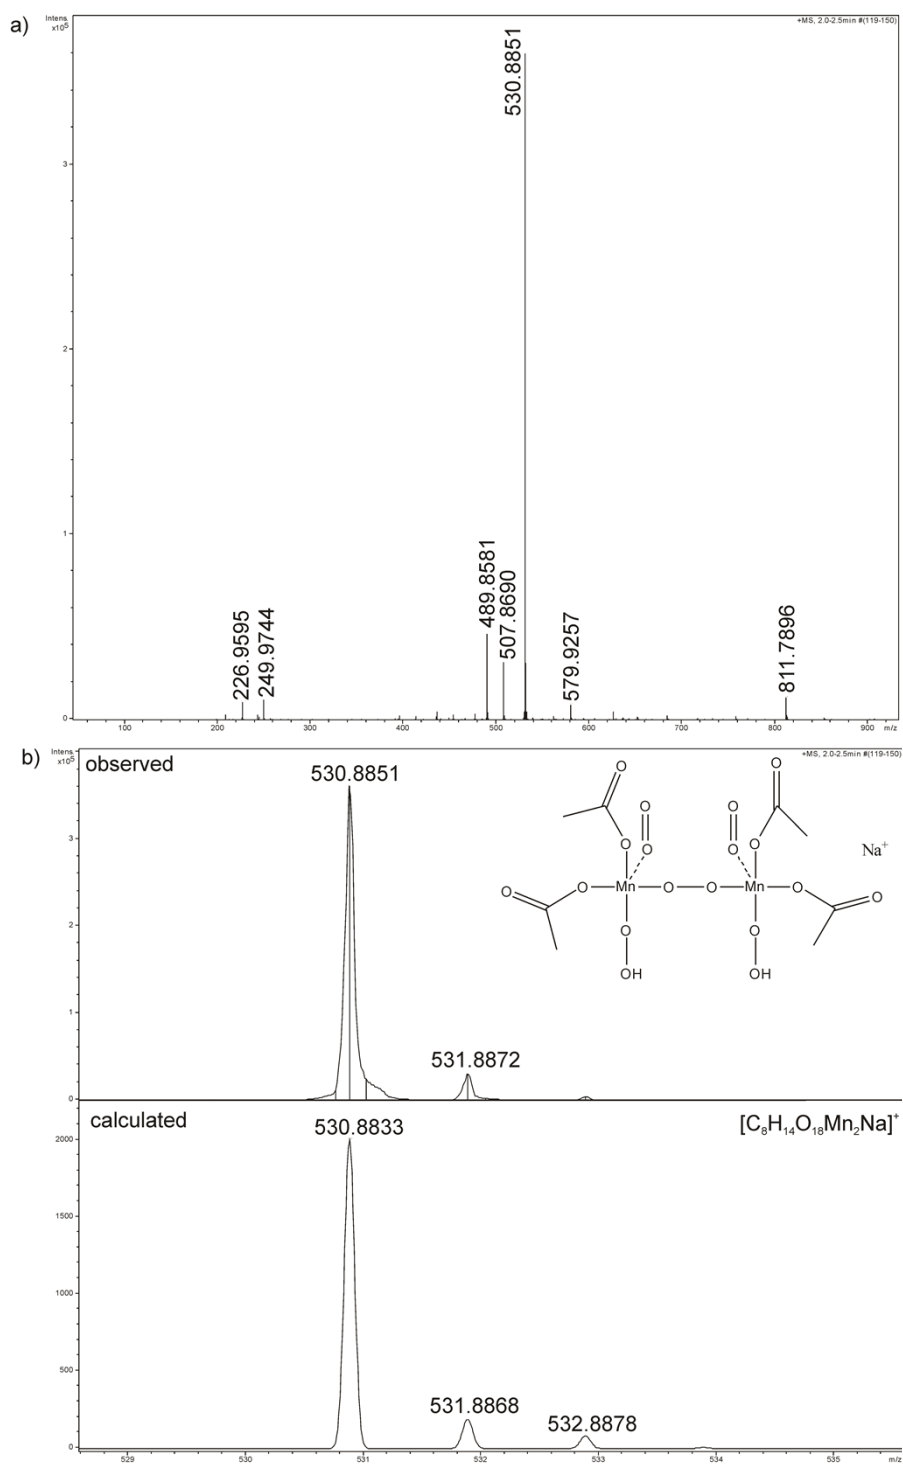

**Fig. S5** a) HRMS (ESI<sup>+</sup>-TOF) spectrum of acetonitrile solution of Mn(OAc)<sub>2</sub>, TFA and *t*BuOOH measured ca. 5 min after mixing all the components at room temperature. b) Observed and calculated isotopic patterns of 530 *m/z* species (error -3.391 ppm). Acquisition parameters: capillary exit 120 V, hexapole RF 100 V, skimmer 1 40 V, hexapole 1 22.8 V.

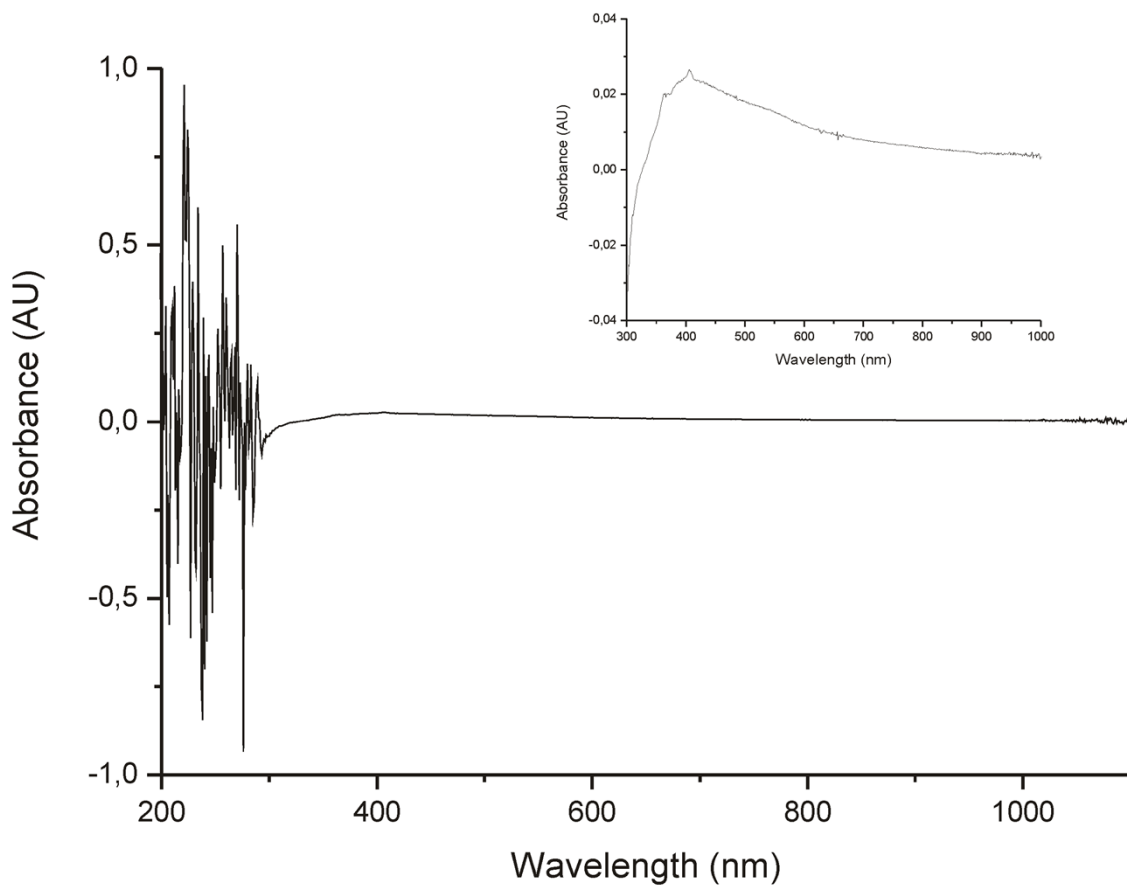

**Fig. S6** UV-Vis spectrum of the concentrated acetonitrile (1.5 mL) solution of  $\text{Mn}(\text{OAc})_2$  (13.2 mg, 0.03 mol/L), TFA (21  $\mu\text{L}$ , 0.15 mol/L) and *t*BuOOH (313  $\mu\text{L}$ , 1.4 mol/L) measured ca. 15 min after mixing all the components at room temperature. In the inset is shown the 300-1000 nm region. UV-Vis spectrum was measured with a Hewlett Packard 8453 spectrophotometer.
